# Supplementary material
Source: PubMed Central journal article supplement (PMC3876736)
Supplement: NIHMS536072-supplement-1.pdf [file NIHMS536072-supplement-1.pdf]

# Supplementary Information

## The TSC-mTOR pathway regulates macrophage polarization

Vanessa Byles<sup>1,3</sup>, Anthony J. Covarrubias<sup>1,3</sup>, Issam Ben-Sahra<sup>1</sup>, Dudley W. Lamming<sup>2</sup>, David M. Sabatini<sup>2</sup>, Brendan D. Manning<sup>1</sup>, and Tiffany Horng<sup>1</sup>

<sup>1</sup>Department of Genetics & Complex Diseases, Harvard School of Public Health, Boston, Massachusetts

<sup>2</sup>Whitehead Institute for Biomedical Research, Cambridge, MA 02142; Department of Biology, MIT, Cambridge, MA 02139; Howard Hughes Medical Institute, MIT, Cambridge, MA 02139; Broad Institute of Harvard and MIT, Seven Cambridge Center, Cambridge, MA 02142; The David H. Koch Institute for Integrative Cancer Research at MIT, Cambridge, MA 02139

<sup>3</sup>These authors contributed equally to this work

Corresponding author:  
Tiffany Horng  
Harvard School of Public Health  
655 Huntington Ave, II-115  
Boston, MA 02115  
Ph: (617) 432-7526  
F: (617) 432-5236  
[thorng@hsph.harvard.edu](mailto:thorng@hsph.harvard.edu)

**Supplementary Figures S1-S9**  
**Supplementary Table S1**

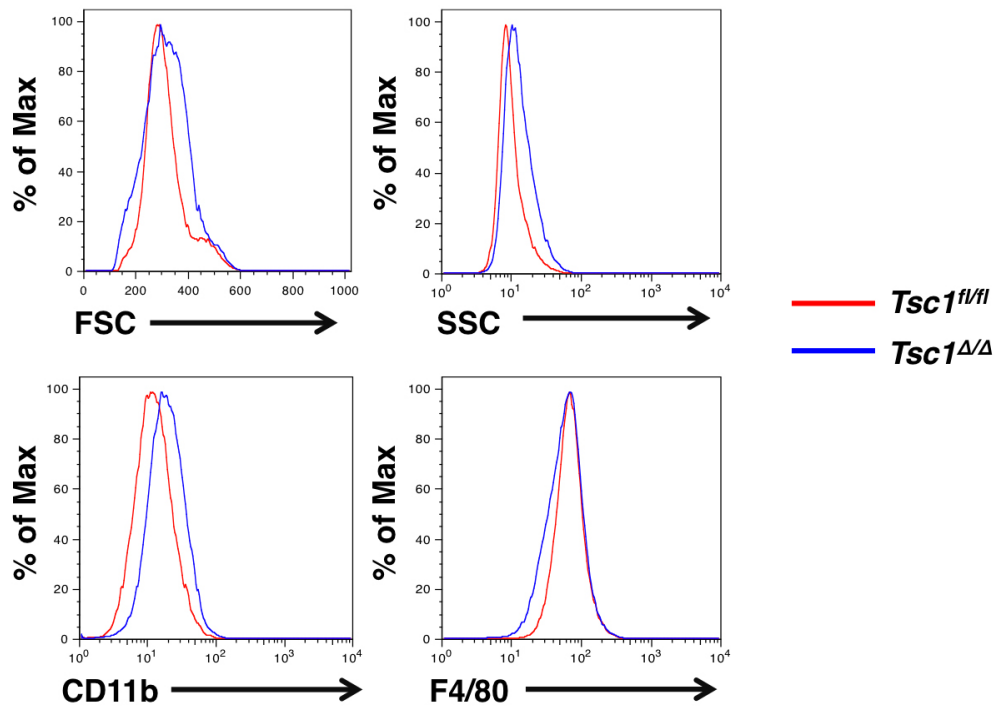

## Supplementary Figure S1. Increased Cell Size and Granularity in *Tsc1<sup>Δ/Δ</sup>* BMDMs

Flow cytometry analysis of *Tsc1<sup>fl/fl</sup>* and *Tsc1<sup>Δ/Δ</sup>* BMDMs stained with macrophage markers CD11b and F4/80. Histogram plots are shown as % of maximum. Red= *Tsc1<sup>fl/fl</sup>* and Blue= *Tsc1<sup>Δ/Δ</sup>*

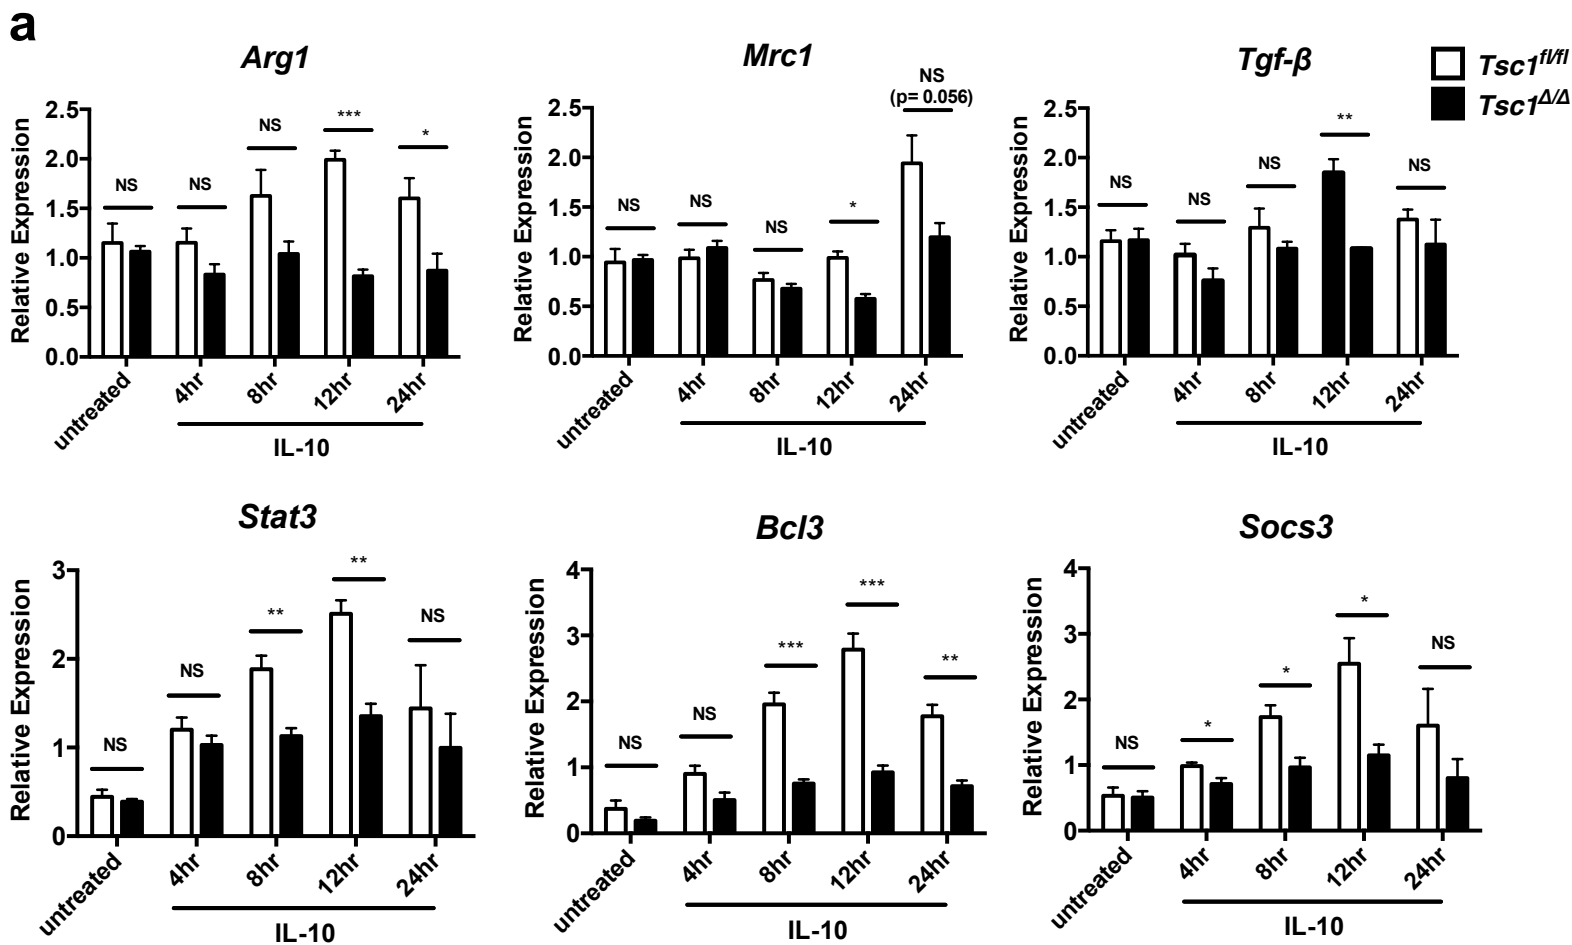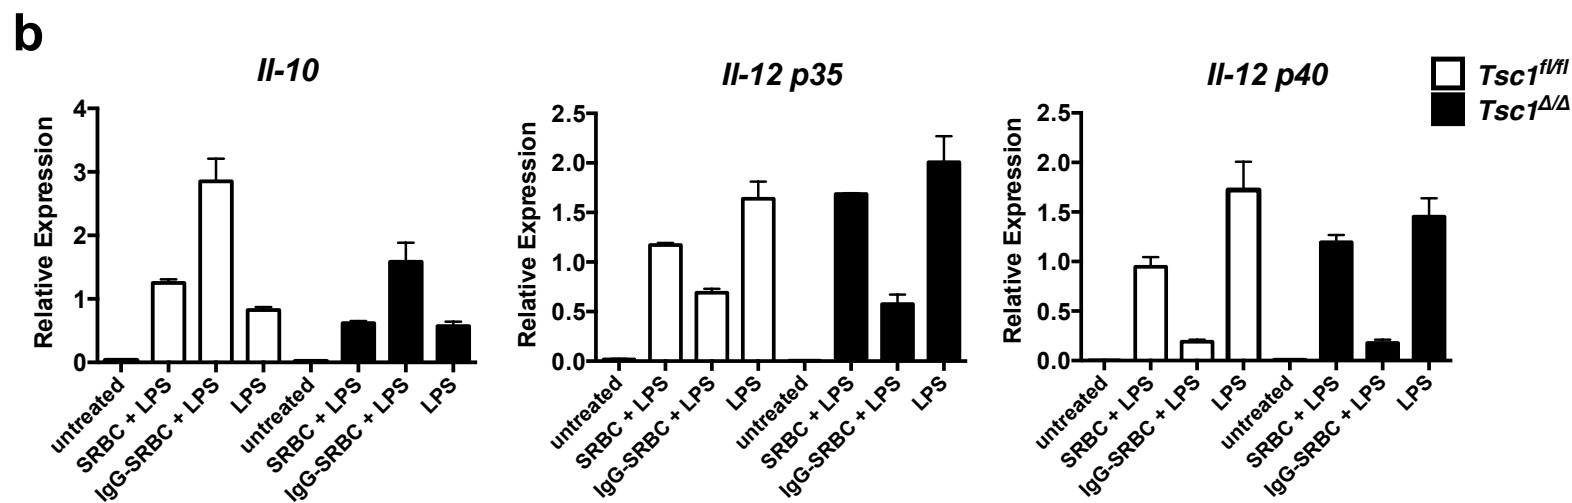

## Supplementary Figure S2. Impaired M2c but not M2b Polarization in *Tsc1 <sup>$\Delta/\Delta$</sup>* BMDMs

**a.** M2c gene expression in *Tsc1<sup>fl/fl</sup>* and *Tsc1 <sup>$\Delta/\Delta$</sup>*  BMDMs stimulated with 10ng/ml IL-10 for the indicated times (n=2 representative experiments). **b.** M2b gene expression of *Tsc1<sup>fl/fl</sup>* and *Tsc1 <sup>$\Delta/\Delta$</sup>*  BMDMs stimulated simultaneously with LPS and non-opsonized (SRBC) or opsonized SRBC (IgG-SRBC) for 6h (Data representative of 3 independent experiments). Graphs are shown as mean  $\pm$  SEM, \*p<0.05, \*\*p<0.01, \*\*\*p<0.001 determined by Student's t-tests.

**a**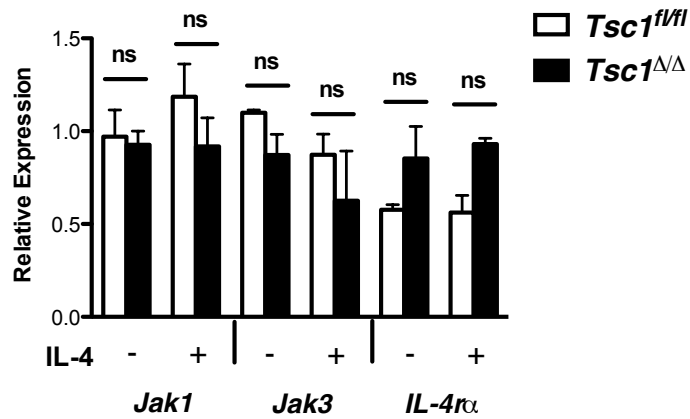**b**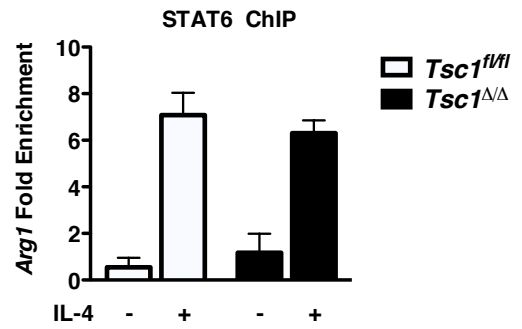**c**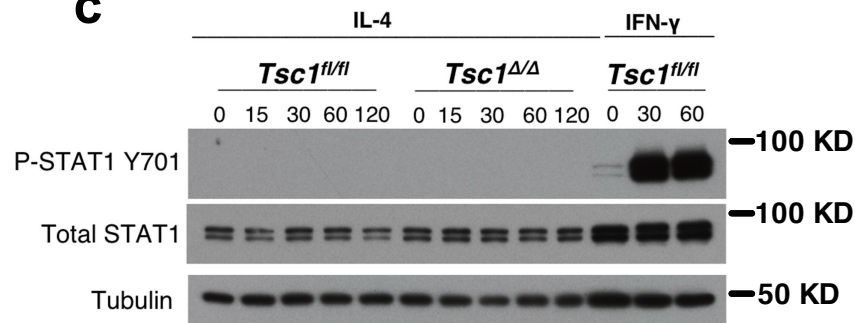

## Supplementary Figure S3. The JAK-STAT6 Pathway is Intact in *Tsc1<sup>Δ/Δ</sup>* BMDMs

**a.** Gene expression of components of the IL-4R-JAK-STAT6 pathway (n=2 representative experiments). **b.** STAT6 chromatin immunoprecipitation. Data is shown as fold enrichment for the *Arg1* promoter and is representative of 3 independent experiments. **c.** IL-4 fails to activate STAT1 in BMDMs. Immunoblot analysis of STAT1 activation in lysates from *Tsc1<sup>fl/fl</sup>* and *Tsc1<sup>Δ/Δ</sup>* BMDMs stimulated with IL-4 or IFN (control) for the indicated time points. Graphs are shown as mean  $\pm$  SEM.

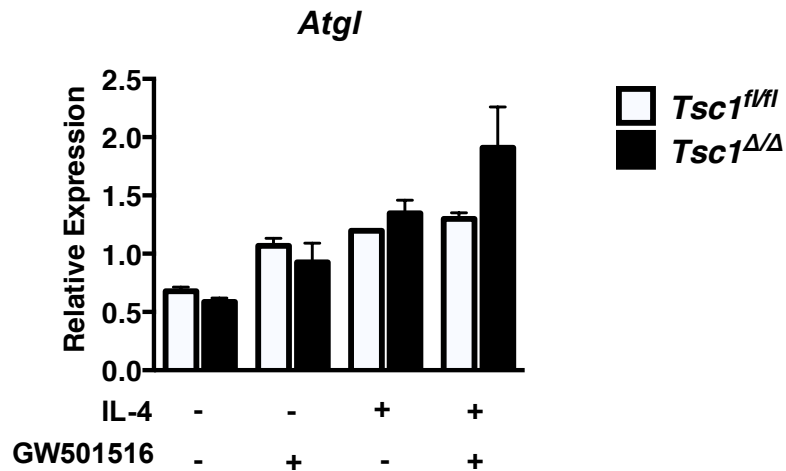

## Supplementary Figure S4. PPAR $\delta$ Activity is Normal in *Tsc1<sup>Δ/Δ</sup>* BMDMs

Gene expression of *Atgl* in *Tsc1<sup>fl/fl</sup>* and *Tsc1<sup>Δ/Δ</sup>* BMDMs stimulated with IL-4 in the presence or absence of GW501516. DMSO vehicle was used as control. Data is shown as mean  $\pm$  SEM (n=2 representative experiments).

**a**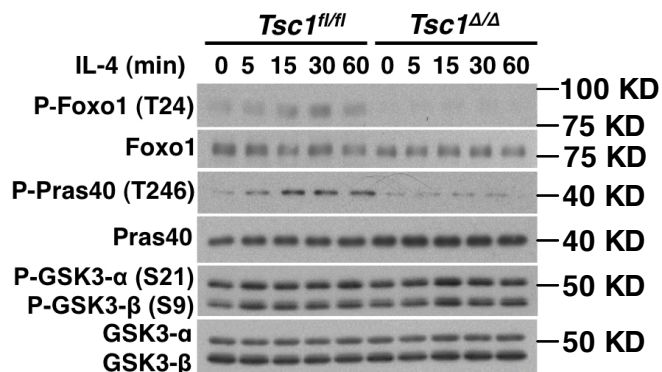**b**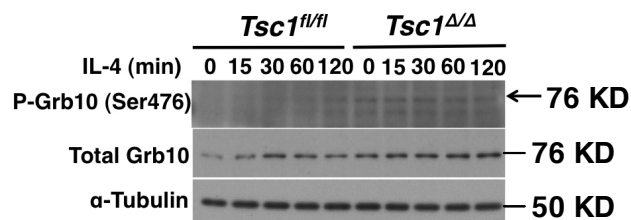**c**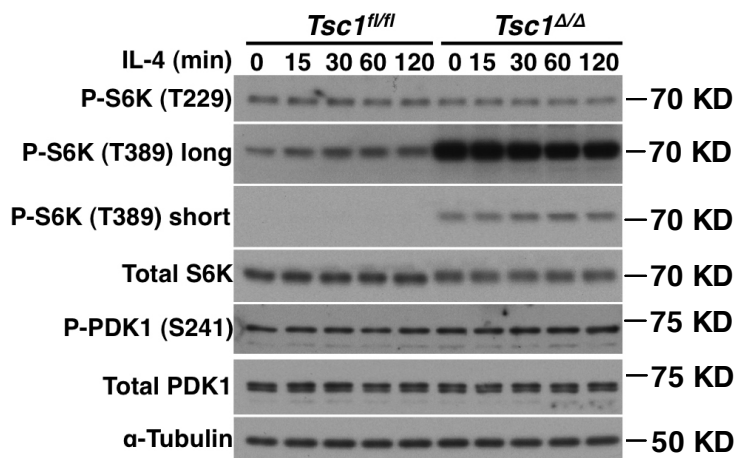**d**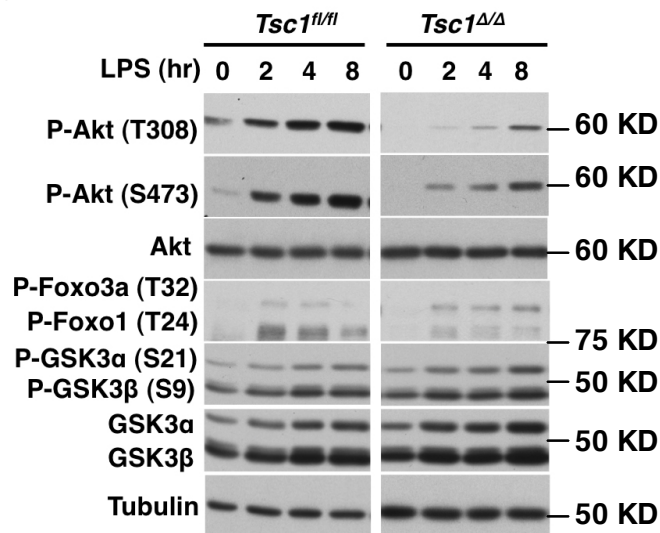

## Supplementary Figure S5. IL-4 and LPS-Induced Akt Activation is Attenuated in *Tsc1<sup>Δ/Δ</sup>* BMDMs

**a-c.** Immunoblots of *Tsc1<sup>fl/fl</sup>* and *Tsc1<sup>Δ/Δ</sup>* BMDMs stimulated with IL-4 as indicated. **a.** Analysis of Akt targets. **b.** Elevated levels of total and phosphorylated Grb10 in *Tsc1<sup>Δ/Δ</sup>* BMDMs. **c.** Analysis of phosphorylated and total PDK1. Phosphorylation of PDK1 is not inducible, and levels of phosphorylated and total PDK1 are normal in *Tsc1<sup>Δ/Δ</sup>* BMDMs. **d.** Immunoblot analysis of Akt signaling in lysates from *Tsc1<sup>fl/fl</sup>* and *Tsc1<sup>Δ/Δ</sup>* BMDMs stimulated with LPS as indicated.

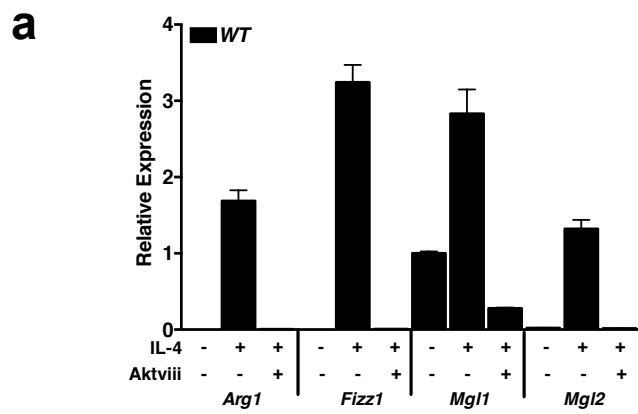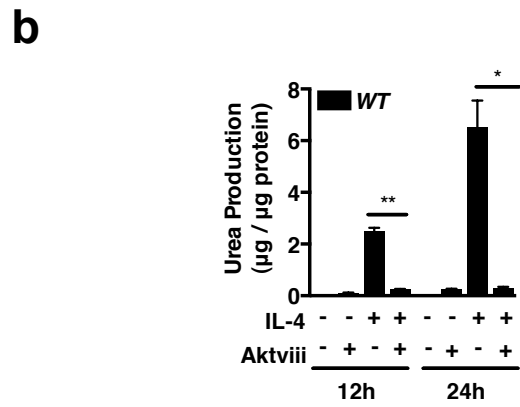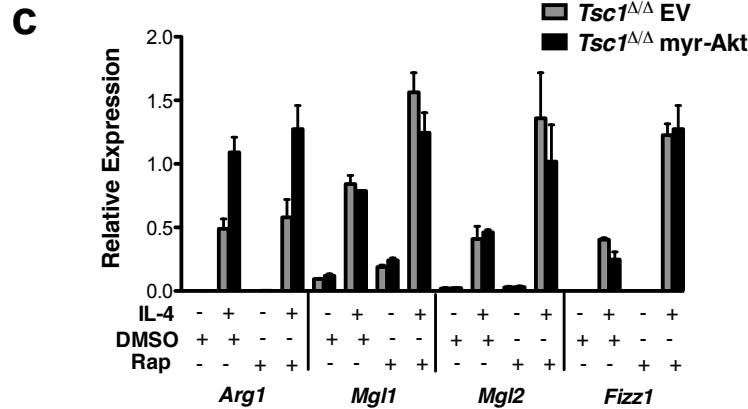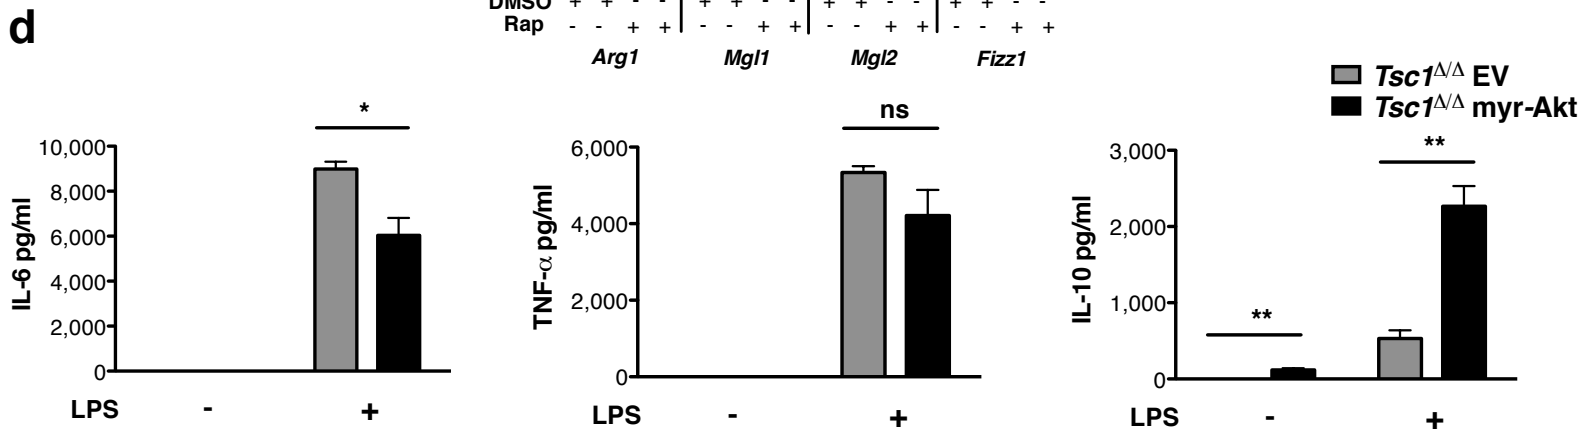

## Supplementary Figure S6. Akt Signaling is Critical for Polarization in *Tsc1 $\Delta/\Delta$* BMDMs

**a-b.** WT BMDMs were pretreated with Aktviii for 1h before IL-4 stimulation. **a.** M2 gene expression was measured after 24h of IL-4 stimulation (representative of 3 independent experiments). **b.** Urea production normalized to total protein (n=3). **c.** M2 gene expression in myr-Akt *Tsc1 $\Delta/\Delta$*  BMDMs and EV *Tsc1 $\Delta/\Delta$*  BMDMs pretreated with rapamycin or DMSO for 30min and stimulated with IL-4 for 12h (n=2 representative experiments). **d.** Cytokine concentration in supernatants from myr-Akt *Tsc1 $\Delta/\Delta$*  BMDMs and EV *Tsc1 $\Delta/\Delta$*  BMDMs treated with LPS for 6h (n=3). Graphs are shown as mean  $\pm$  SEM, \*p<0.05, \*\*p<0.01 determined by Student's t-tests.

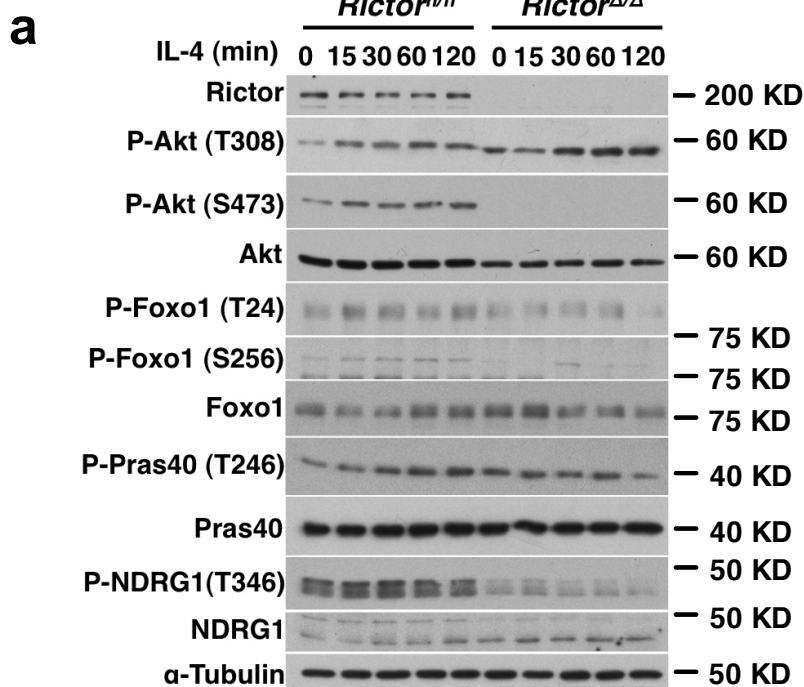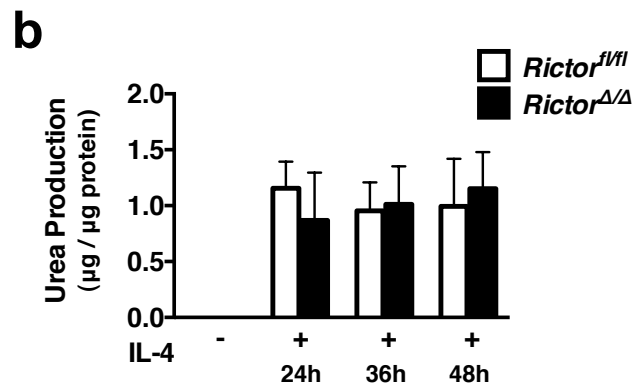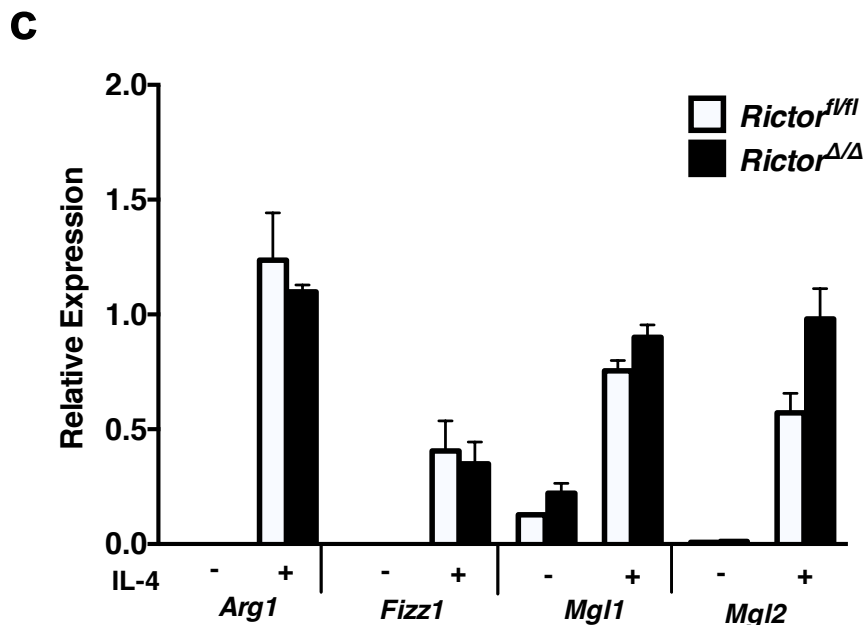

## Supplementary Figure S7. Intact M2 Polarization in *Rictor<sup>Δ/Δ</sup>* BMDMs

**a.** Reduced phosphorylation of the Akt target Foxo1, but not Pras40 in *Rictor<sup>Δ/Δ</sup>* BMDMs. Immunoblot analysis of lysates from *Rictor<sup>fl/fl</sup>* and *Rictor<sup>Δ/Δ</sup>* BMDMs stimulated with IL-4 as indicated. **b.** Urea production normalized to total protein after stimulation with IL-4 as indicated (n=2 representative experiments). **c.** M2 gene expression analysis in *Rictor<sup>fl/fl</sup>* and *Rictor<sup>Δ/Δ</sup>* BMDMs stimulated with IL-4 for 24h (n=2 representative experiments). Graphs are shown as mean ± SEM.



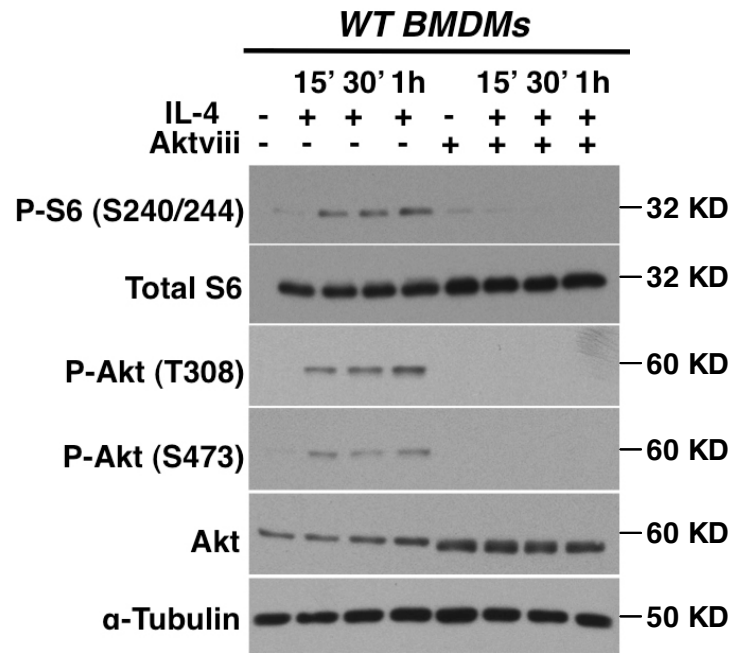

## Supplementary Figure S8. Akt Signaling is Critical for mTORC1 Activation in BMDMs

Immunoblot analysis of WT BMDMs pretreated with Aktviii for 1h before IL-4 stimulation for the indicated times. Reduced phosphorylation of S6 on S240/244 indicates attenuated mTORC1 activity in the presence of Aktviii.

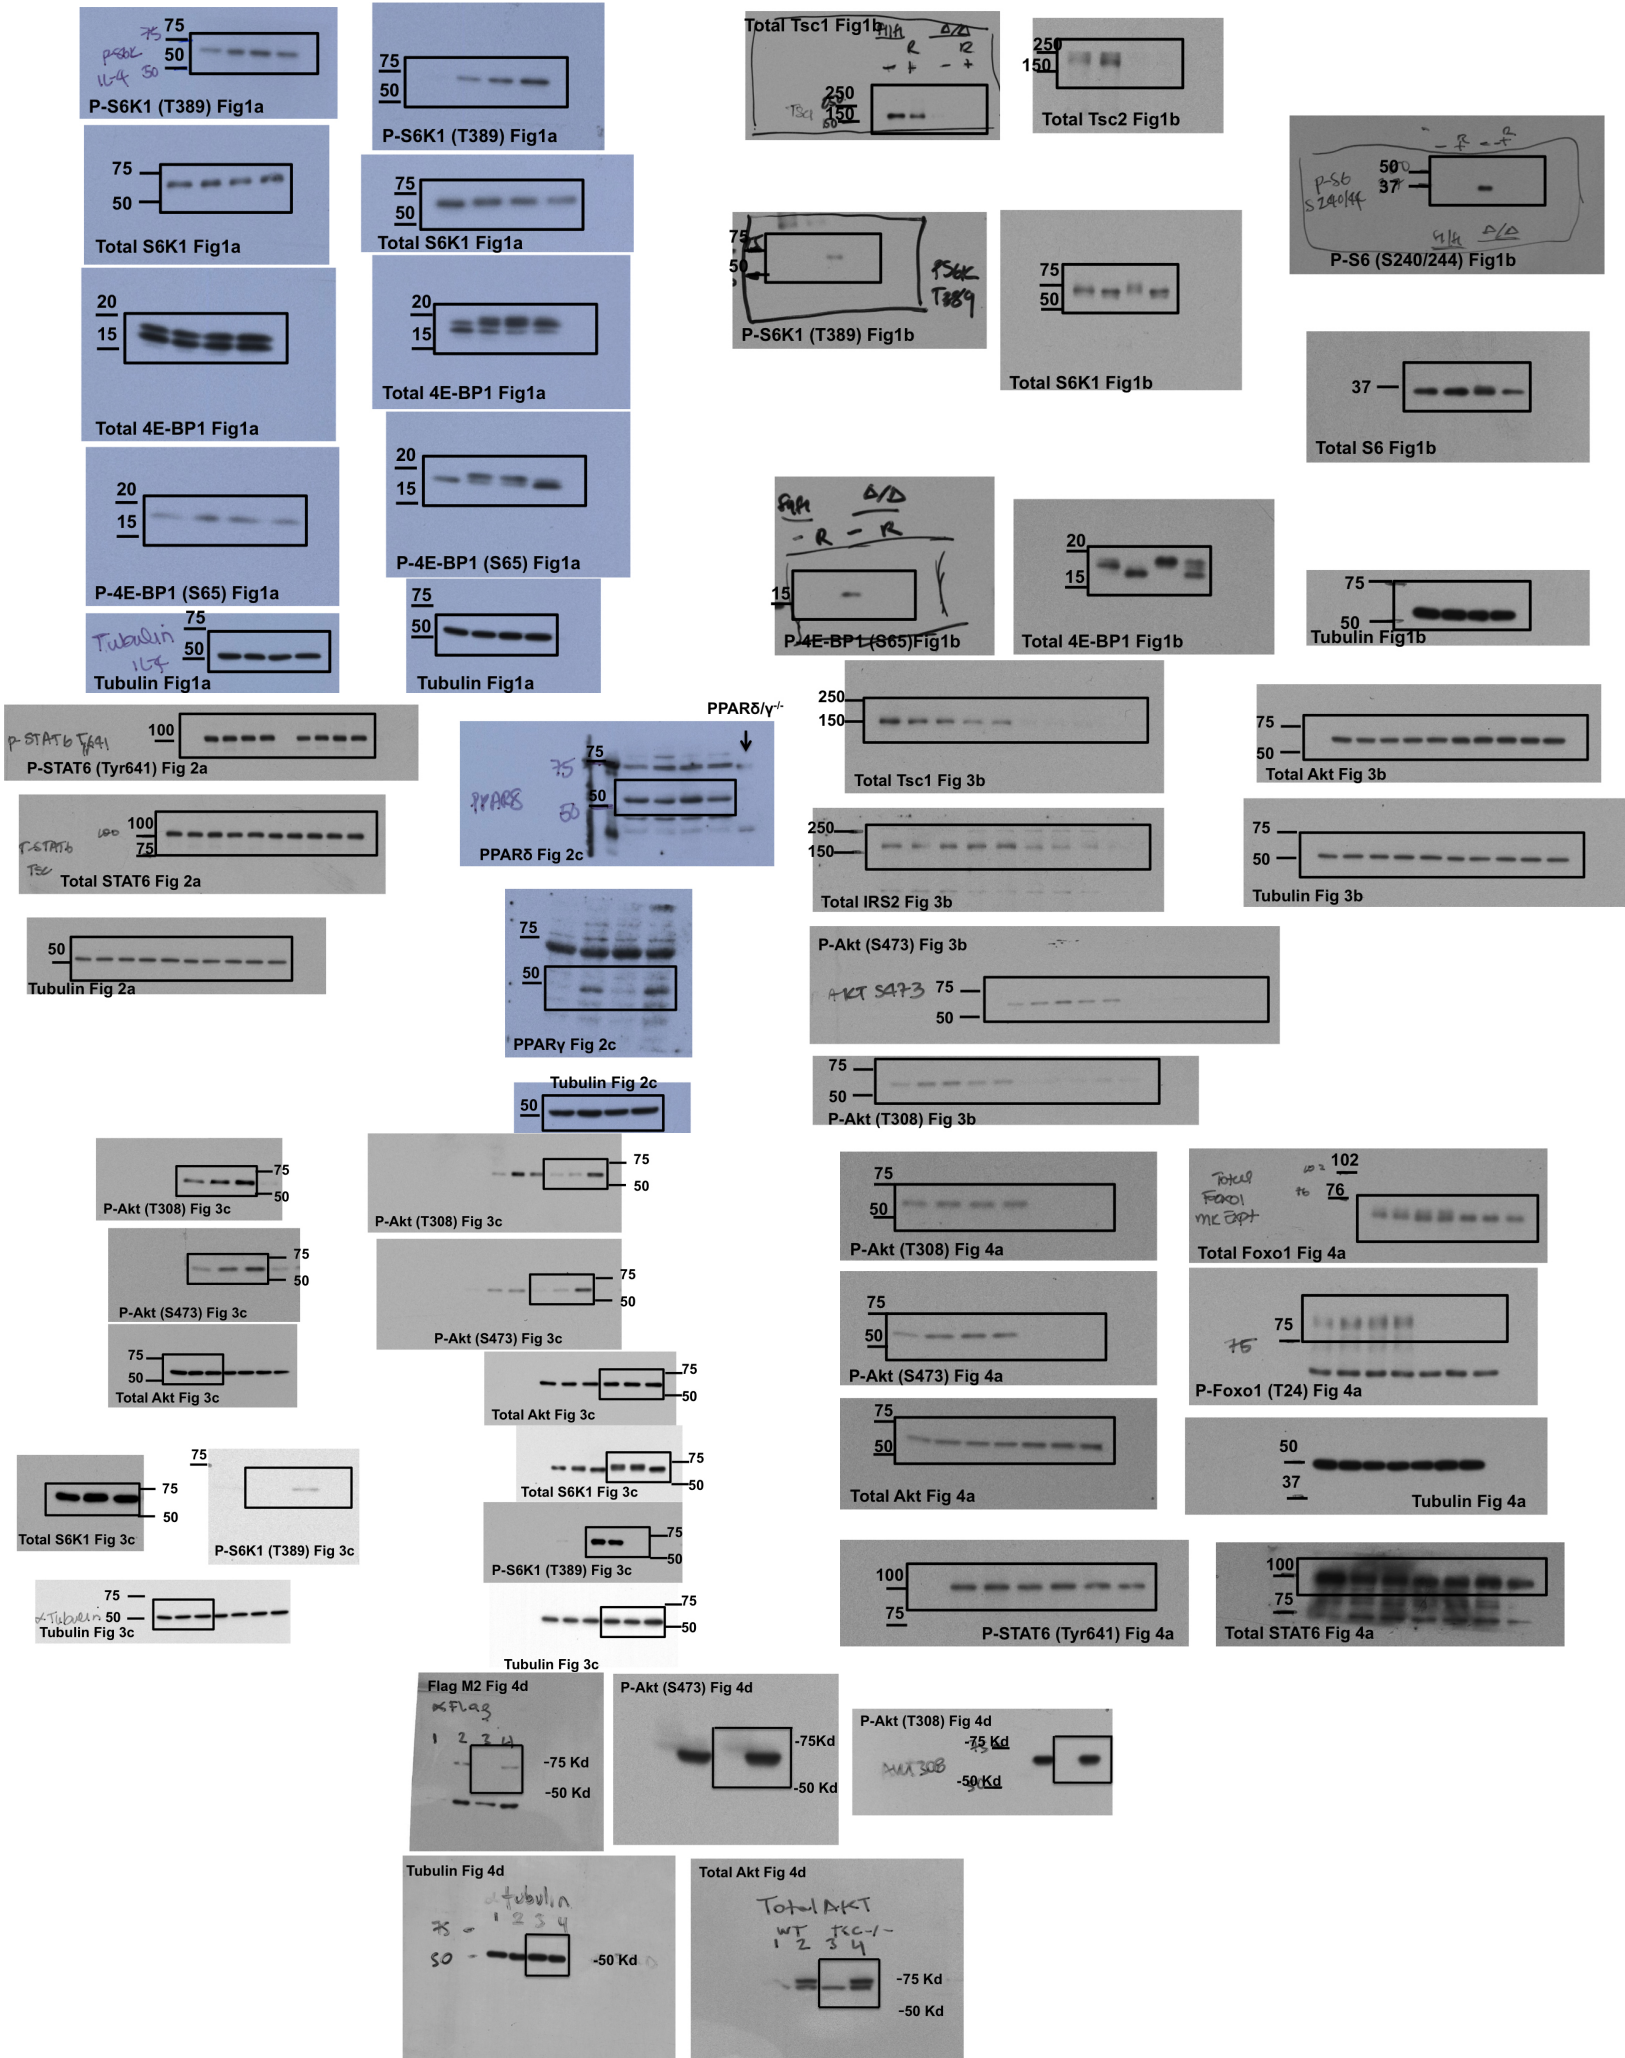

**Supplementary Figure S9. Full Blots for Main Text Figures**

## Supplementary Table S1. qPCR Primer Sequences.

| Gene                           | Primer Sequence (5'-3')                                                  |
|--------------------------------|--------------------------------------------------------------------------|
| <i>Arg-1</i>                   | F: ACC TGG CCT TTG TTG ATG TCC CTA<br>R: AGA GAT GCT TCC AAC TGC CAG ACT |
| <i>Mgl-1</i>                   | F: TGC AAC AGC TGA GGA AGG ACT TGA<br>R: AAC CAA TAG CAG CTG CCT TCA TGC |
| <i>Mgl-2</i>                   | F: GCA TGA AGG CAG CTG CTA TTG GTT<br>R: TAG GCC CAT CCA GCT AAG CAC ATT |
| <i>Fizz-1</i>                  | F: TCC AGC TGA TGG TCC CAG TGA ATA<br>R: ACA AGC ACA CCC AGT AGC AGT CAT |
| <i>Ym1</i>                     | F: AGA AGG GAG TTT CAA ACC T<br>R: GTC TTG CTC ATG TGT GTA AGT GA        |
| <i>Mrc1</i>                    | F: TGG GCT ACA GGA GAA CCC AAC TTT<br>R: GCA GTG GCA TTG ATG CTG CTG TTA |
| <i>Pgc1<math>\beta</math></i>  | F: CTT CCG TTG GCC CAG ATA C<br>R: CTG CTG GGC CTC TTT CAG TA            |
| <i>Fabp4</i>                   | F: ATG AAA TCA CCG CAG ACG ACA GGA<br>R: TGT GGT CGA CTT TCC ATC CCA CTT |
| <i>Cd36</i>                    | F: TCA TGC CAG TCG GAG ACA TGC TTA<br>R: AAC TGT CTG TAC ACA GTG GTG CCT |
| <i>Il-6</i>                    | F: ACA AAG CCA GAG TCC TTC AGA GAG<br>R: TTG GAT GGT CTT GGT CCT TAG CCA |
| <i>Tnf-<math>\alpha</math></i> | F: TCT CAG CCT CTT CTC ATT CCT GCT<br>R: AGA ACT GAT GAG AGG GAG GCC ATT |
| <i>Il-10</i>                   | F: GCT CTT ACT GAC TGG CAT GAG<br>R: CGC AGC TCT AGG AGC ATG TG          |
| <i>Tgf<math>\beta</math></i>   | F: GTG CGG CAG CTG TAC ATT GAC TTT<br>R: TGT GTT GGT TGT AGA GGG CAA GGA |
| <i>Stat3</i>                   | F: TGT GAT GCC TCC TTG ATC GTG ACT<br>R: CCA CAG GAT TGA TGC CCA AGC ATT |
| <i>Bcl3</i>                    | F: TCG CAA TTA TGA AGG GCT CAC TGC<br>R: TGC ACC ATG TTC AGG CTG TTG TTC |

|                                |                                                                            |
|--------------------------------|----------------------------------------------------------------------------|
| <b>Socs3</b>                   | F: TAG ACT TCA CGG CTG CCA ACA TCT<br>R: GGA GCT AGT CCC GAA GCG AAA TCT   |
| <b>Il-12 p35</b>               | F: TGC CCT CCT AAA CCA CCT CAG TTT<br>R: TTT CTC TGG CCG TCT TCA CCA TGT   |
| <b>Il-12 p40</b>               | F: GGC TGG TGC AAA GAA ACA TGG ACT<br>R: AGA GAC GCC ATT CCA CAT GTC ACT   |
| <b>Atg1</b>                    | F: TGG AAC CAA AGG ACC TGA TGA CCA<br>R: AGA TGC TAC CCG TCT GCT CTT TCA   |
| <b>Cd68</b>                    | F: TTC TGC TGT GGA AAT GCA AG<br>R: CAA TGA TGA GAG GCA GCA AG             |
| <b>Jak1</b>                    | F: GAT AAG GAG TAC TAC ACA GTC AAG<br>R: CAG ACA TCA GAG GCG ATA TAA A     |
| <b>Jak3</b>                    | F: CTT GAT GAG CCA AGT ATC CTA C<br>R: TGC TCC TAG ATA CAC AAA TTC C       |
| <b>Il4ra</b>                   | F: AGA TGC AAG CCT TCA GAA TCT GGG<br>R: CGT GGA TGC CCA AGA ACA CAC TAT   |
| <b>Ppar<math>\gamma</math></b> | F: TCA TGA CCA GGG AGT TCC TC<br>R: CAG GTT GTC TTG GAT GTC CTC            |
| <b>Ppar<math>\delta</math></b> | F: AGC ACA TCT ACA ACG CCT ACC TGA<br>R: TCG ATG TCG TGG ATG ACA AAG GGT   |
| <b>Hprt</b>                    | F: TTT CCC TGG TTA AGC AGT ACA GCC C<br>R: TGG CCT GTA TCC AAC ACT TCG AGA |
